# Supplementary material for: Development of a robust sulfur quantification and speciation method for SBA-15-supported sulfonic acid catalysts
Source: Royal Society of Chemistry journal article supplement (doi:10.1039/c6cy00292g), 2016-01-01
Supplement: c6cy00292g1.pdf [file c6cy00292g1.pdf]

## Supplemental Information

### Development of Robust Sulfur Quantification and Speciation Method for SBA-15

#### Supported Sulfonic Acid Catalysts

Yu Noda<sup>1</sup>, Kaijin Li<sup>1</sup>, Alexander M. Engler<sup>1</sup>, William Elliot<sup>1</sup>, and Robert M. Rioux<sup>1,2\*</sup>

<sup>1</sup>Department of Chemical Engineering

<sup>2</sup>Department of Chemistry

165 Fenske Laboratory

The Pennsylvania State University

University Park, PA 16802

\*rioux@engr.psu.edu; (814)867-2503

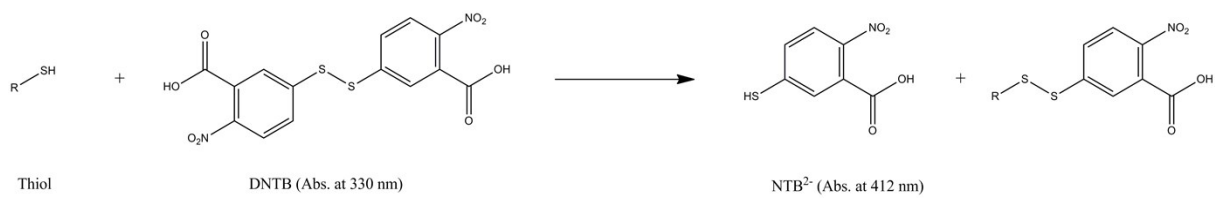

**Scheme S1.** Detection of SH by Ellman's reaction.

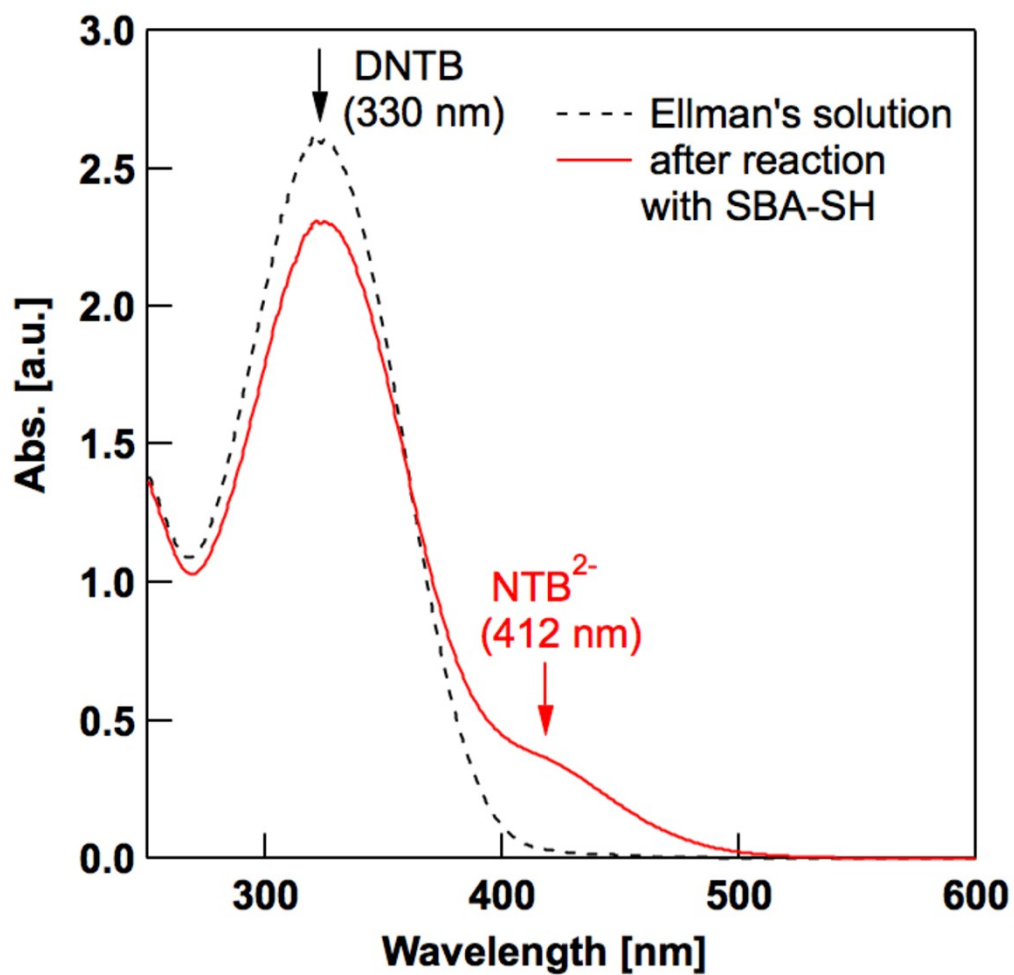

**Figure S1.** UV-Vis spectra of Ellman's solution before and after reaction with SBA-SH.

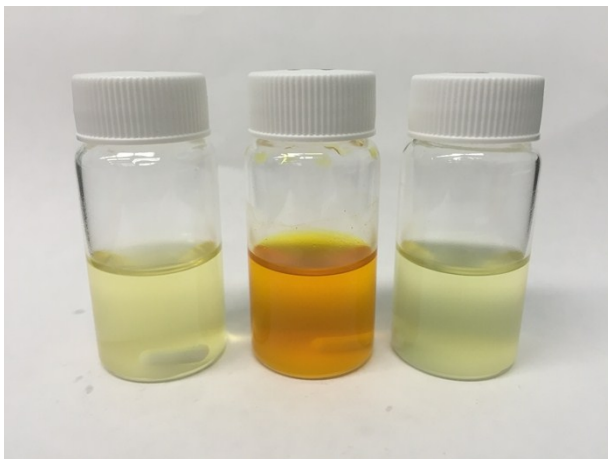

**Figure S2.** Photograph of Ellman's solution after reaction with SBA-15, SBA-SH and SBA-SH-ox-a (From left to right).

A clear color distinction between the samples demonstrates the successful incorporation and detection of SH in SBA-SH, as well as complete SH conversion after oxidation with a 30%  $\text{H}_2\text{O}_2$  solution.

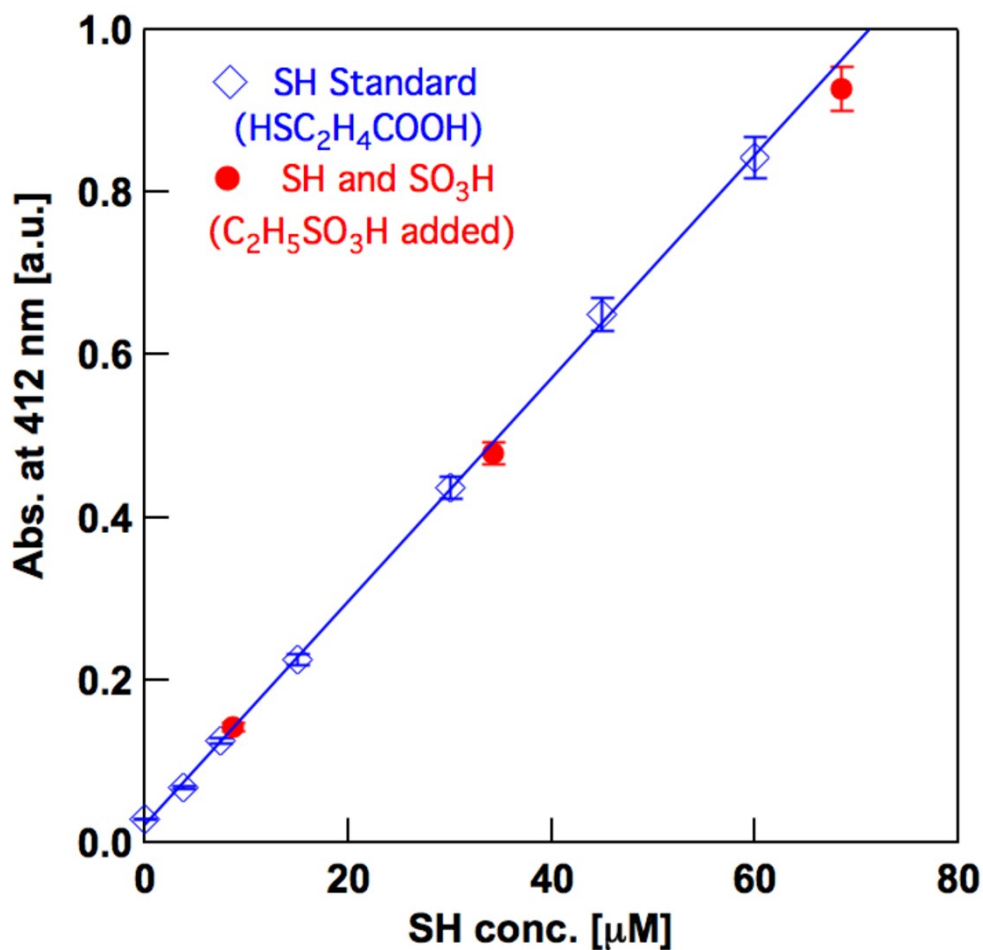

**Figure S3.** Determination of extinction coefficient from absorption at 412 nm due to Ellman's reaction product,  $\text{NTB}^{2-}$  with 3-mercaptopropionic acid solutions (homogeneous SH standard). The addition of sulfonic acid (ethanesulfonic acid 3 mM) to the SH standard solution did not disrupt Ellman's test results.

Although the peak for  $\text{NTB}^{2-}$  (412 nm), the product of Ellman's reaction with SH, overlapped with the Ellman's reagent peak (330 nm), a linear calibration curve ( $R^2 > 0.99$ ) was obtained from the absorbance reading at 412 nm with 3-mercaptopropionic acid solutions with varying

concentrations (0-80  $\mu\text{M}$ ). The extinction coefficient of the  $\text{NTB}^{2-}$  (412 nm) was determined experimentally to be  $13800 \text{ M}^{-1}$ . Ellman's test is not disrupted by the presence of the sulfonic acid groups in solution. This was verified as shown in **Figure S4** by a control Ellman's test using a mixture of 3-mercaptopropionic acid (SH) and 3 mM ethanesulfonic acid ( $\text{SO}_3\text{H}$ ), where the absorbance at 412 nm was not influenced.

**Table S1.** Reaction time dependence of Ellman's test for SH-SBA-15 samples.

| Ellman's test reaction time<br>(h) | SH Quantity<br>(MPTMS:OH = 10)<br>(mmol/g <sub>cat</sub> ) |
|------------------------------------|------------------------------------------------------------|
| 0.5                                | 0.665                                                      |
| 2                                  | 0.715                                                      |
| 4                                  | 0.708                                                      |
| 24                                 | 0.667                                                      |
| 48                                 | 0.664                                                      |

Varying the reaction time (0.5-48 h) showed that Ellman's test on solid samples was sensitive to this time, and the maximum NTB<sup>2-</sup>, the Ellman's test reaction product, was determined after 2 h. Prolonged reaction greater than 4 h resulted in a decrease in NTB<sup>2-</sup> concentration. We speculate the decrease was caused by a combined effect of the decomposition of NTB<sup>2-</sup> and adsorption of NTB<sup>2-</sup> onto SBA-15 mesoporous silica. Riddles et al.<sup>1</sup> reported that NTB<sup>2-</sup> can be oxidized back to the original Ellman's reagent (DNTB) under the presence of oxygen. A similar decrease in NTB<sup>2-</sup> for longer reaction time (16 h) was also observed in Ellman's test with homogeneous SH standard (3-mercaptopropionic acid) under similar reaction conditions.

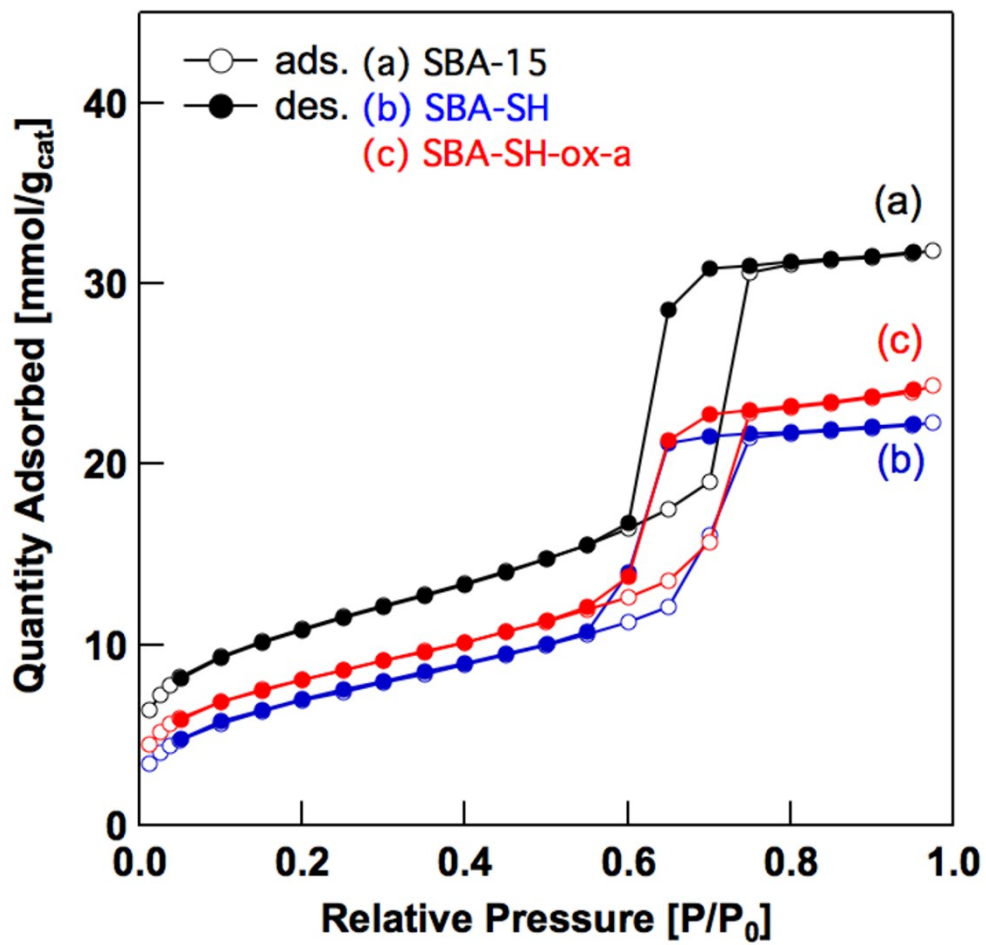

**Figure S4.** N<sub>2</sub> adsorption-desorption isotherms of (a) SBA-15, (b) SBA-SH, and (c) SBA-SH-ox-a.



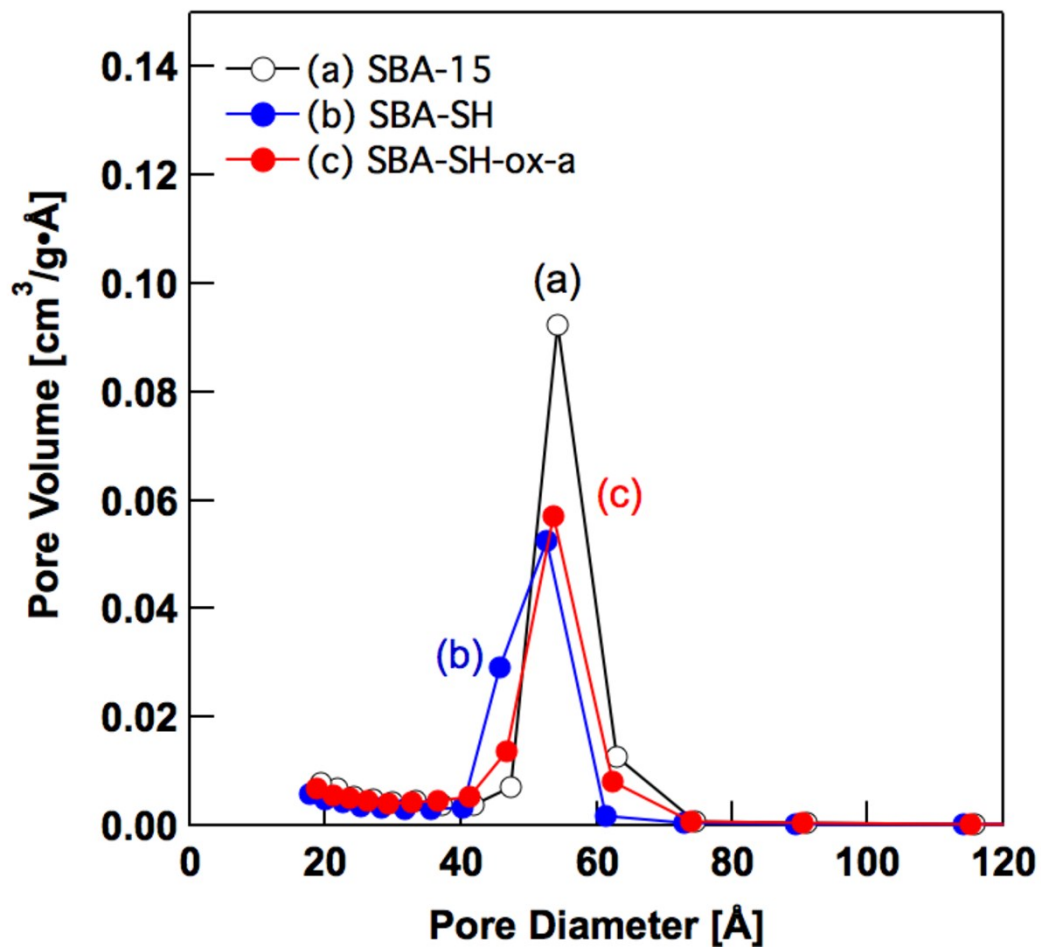

**Figure S5.** Pore diameter distribution (BJH plot) of (a) SBA-15, (b) SBA-SH, and (c) SBA-SH-ox-a.

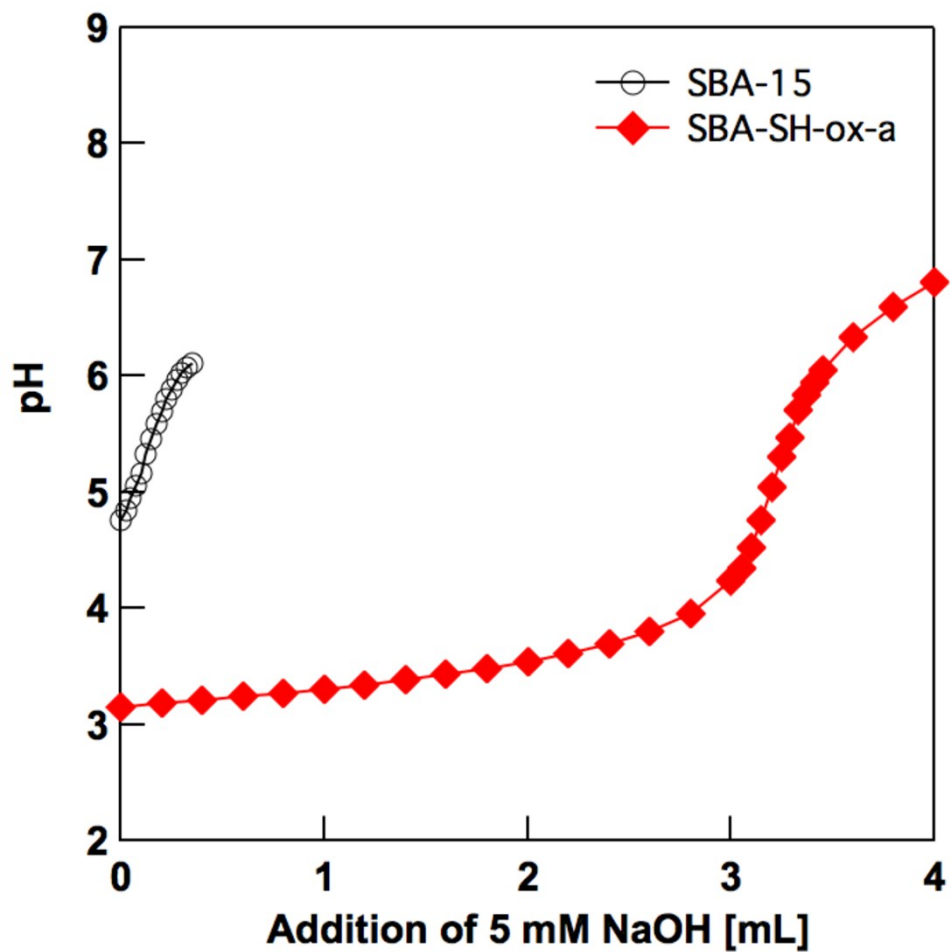

**Figure S6.** Acid-base titration profiles of SBA-15 and SBA-SH-ox-a. 50 mg SBA-15 sample; 10 mL of 10 mM NaCl. Each point was recorded after mixing for 5 min.

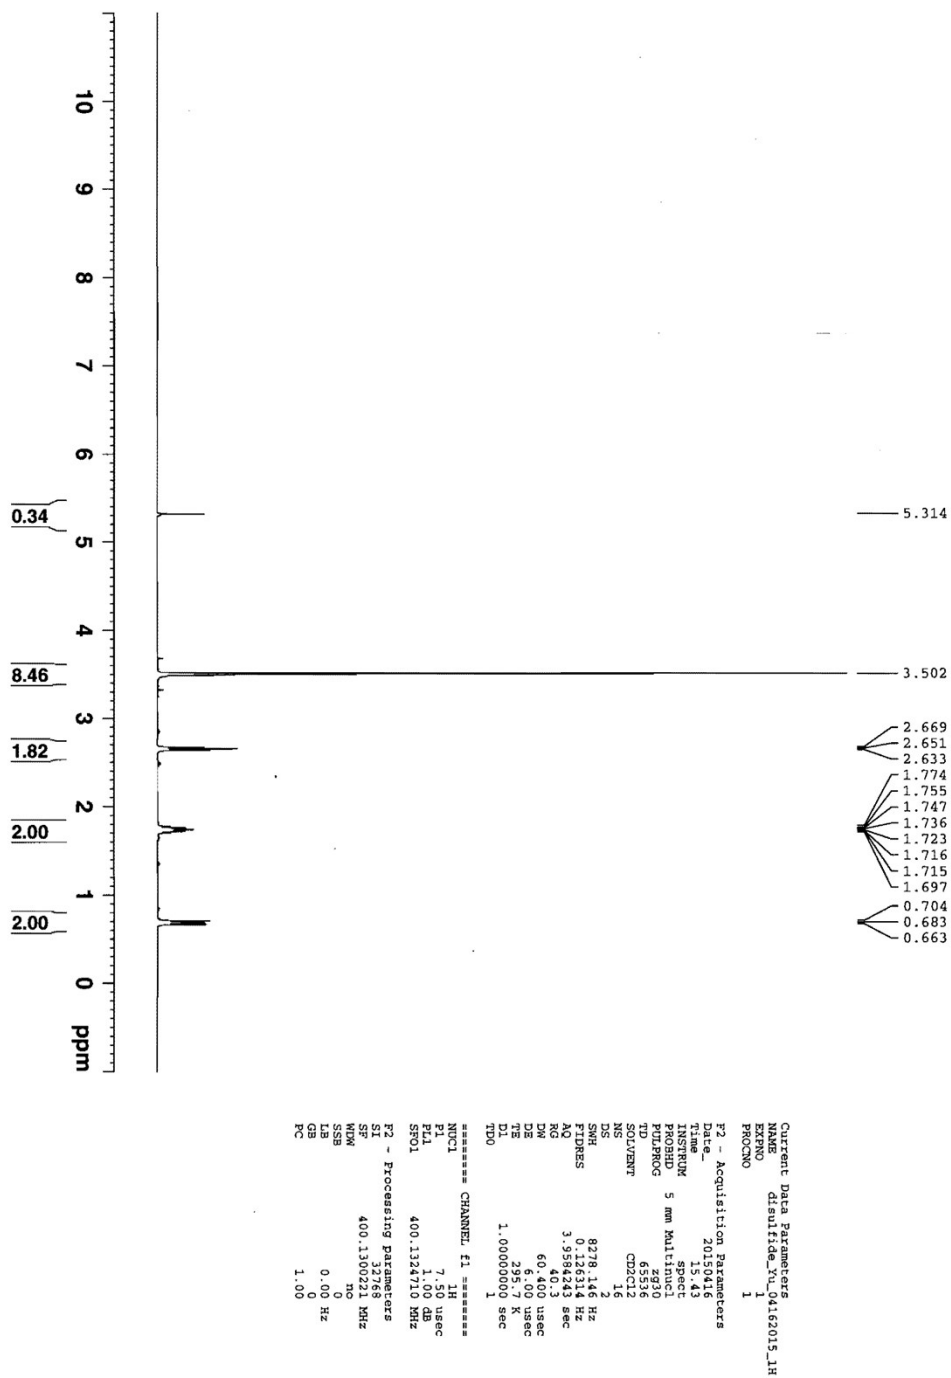

Figure S7. <sup>1</sup>H NMR spectrum of disulfide dipropyl silane (SS precursor).

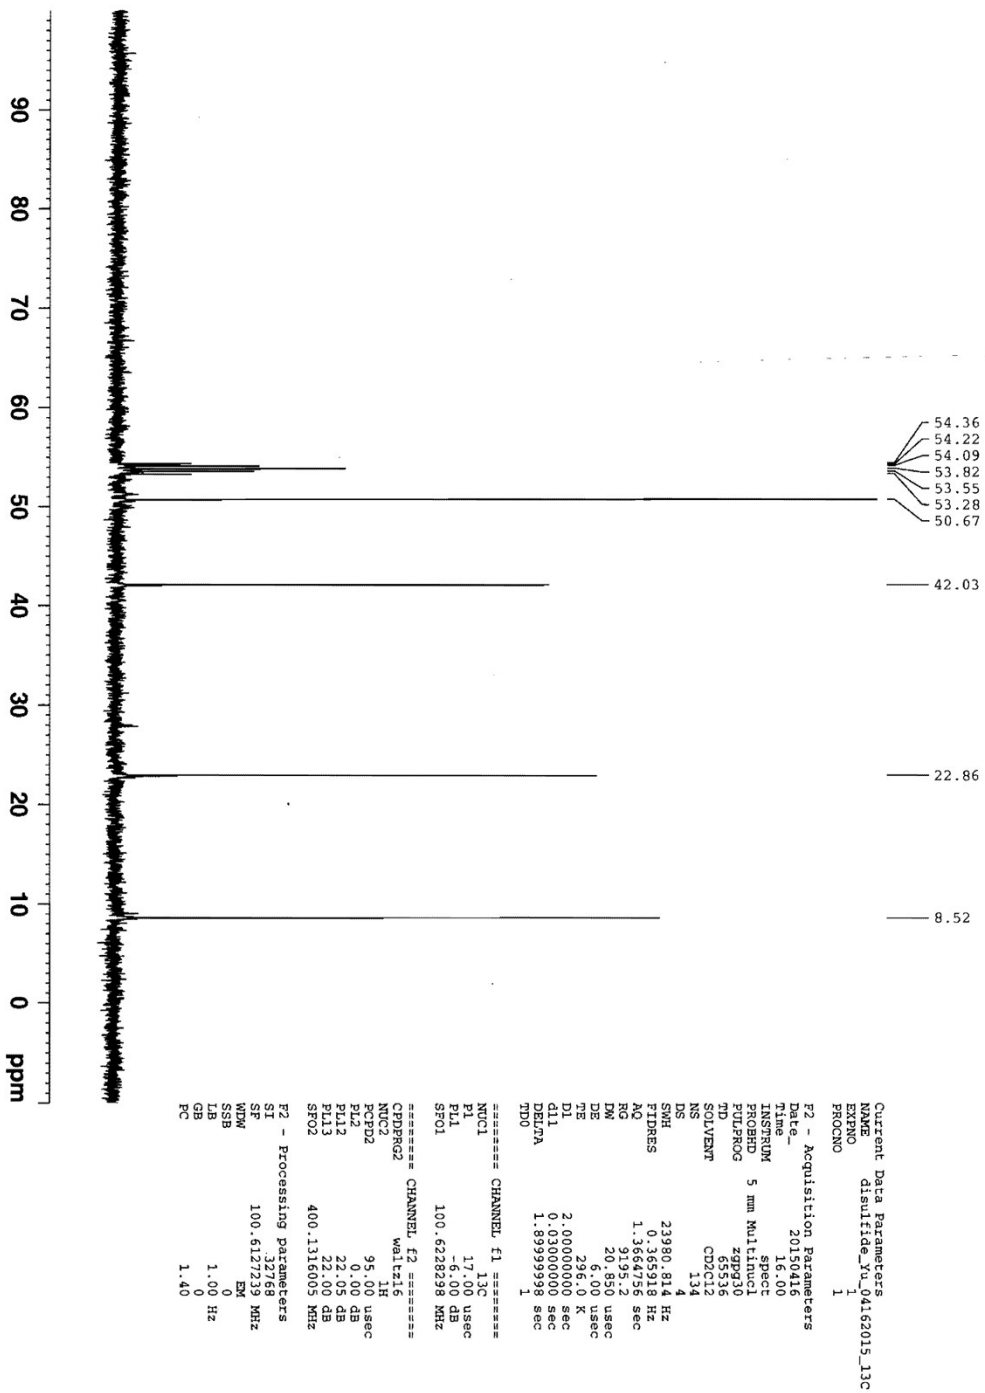

Figure S8. <sup>13</sup>C NMR spectrum of disulfide dipropyl silane (SS precursor).

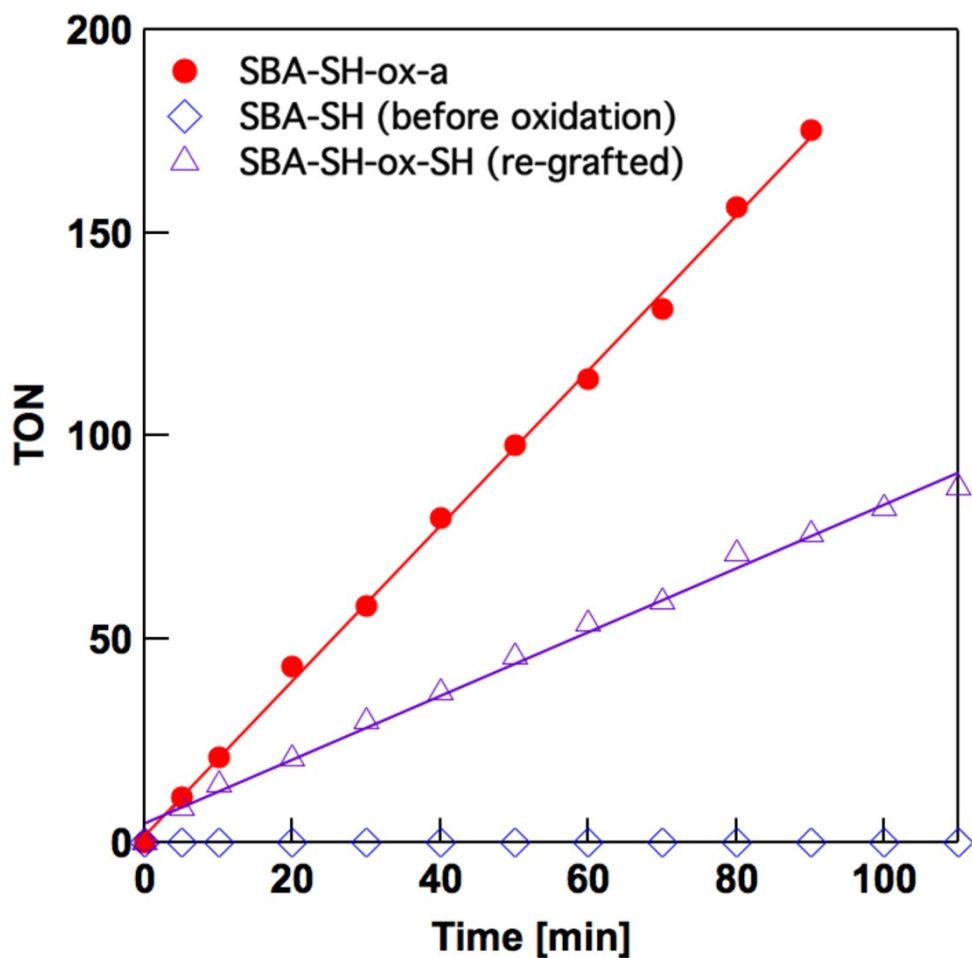

**Figure S9.** Time course of esterification reaction of acetic acid and methanol over three SBA-15 catalysts: SBA-SH, SBA-SH-ox-a, and SBA-SH-ox-SH. Reaction conditions were 3 M acetic acid, 6 M MeOH in 1,4-dioxane as a solvent, catalyst loading of 50 mg and  $T = 323$  K.

### References

- (1) Riddles, P. W.; Blakeley, R. L.; Zerner, B. Reassessment of Ellman Reagent. *Methods Enzymol.* **1983**, *91*, 49–60.
